# Supplementary material for: Natural History of Histologically Non-Muscle Invasive VI-RADS 4-5 Bladder Cancer Lesions
Source: Research Square preprint supplement (doi:10.21203/rs.3.rs-8630938/v1), 2026-02-13
Supplement: Supplementary file 1 [file 515c9b8c3b0590d114415671.docx]

Supplementary Table 2: Effect of VI-RADS on recurrence-free survival  according to EAU 2021 Risk Groups

|  | **HR** | **CI 95%** | **p** |
| --- | --- | --- | --- |
| Low Risk | 1.130 | 0.386-3.309 | 0.823 |
| Indermediate Risk | 6.773 | 1.534-29.904 | 0.012 |
| High/Very-High Risk | 1.902 | 1.140-3.173 | 0.014 |

CI: Confidence Interval, HR: Hazard Ratio
