# Supplementary material for: Natural History of Histologically Non-Muscle Invasive VI-RADS 4-5 Bladder Cancer Lesions
Source: Research Square preprint supplement (doi:10.21203/rs.3.rs-8630938/v1), 2026-02-13
Supplement: Supplementary file 2 [file ea186425f0c8b9601d053392.docx]

Supplementary Table 1: Characteristics according to VI-RADS

|  | VI-RADS-1 | VI-RADS-2 | VI-RADS-3 | VI-RADS-4 | VI-RADS-5 | p |
| --- | --- | --- | --- | --- | --- | --- |
| Age, years mean±SD | 64.1±11.7 | 65.2±12.1 | 66.2±10.1 | 66.2±9.7 | 74.3±11.7 | 0.594 |
| Sex n(%)  -Female  -Male | 2 (14.3)  12 (85.7) | 6 (8.5)  65 (91.5) | 6 (17.1)  29 (82.9) | 2 (11.1)  16 (88.9) | 1 (25)  3 (75) | 0.653 |
| BMI, kg/m2 mean±SD | 29.4±5.5 | 26.1±3.4 | 27.1±4.7 | 27.3±5.9 | 28.9±4.4 | 0.096 |
| Smoking,package/years mean±SD | 11.9±13.4a | 25.1±17.5a | 25.5±15.6a | 36.4±27.6b | 10.1±11.5a | 0.004 |
| Family history of bladder cancer n(%)  -Absent  -Present | 14 (100)  0 (0) | 69 (97.2)  2 (2.8) | 32 (100)  0 (0) | 18 (100)  0 (0) | 4 (100)  0 (0) | 0.400 |
| Tumor multifocality n(%)  -Single  -Multiple | 14 (100)a  0 (0) a | 59 (83.1) a  12 (16.9) a | 29(82.9)a,b  6 (17.1) a,b | 12 (66.7)a,b  6 (33.3) a,b | 1 (25)b  3 (75)b | 0.007 |
| Tumor length,mm mean±SD | 9.2±6.2a | 22.6±11.3b | 21.6±13.1b | 33.6±13.6 b | 43.1±8.6 b | 0.001 |
| Tumor grade n(%)  -Low grade  -High grade | 6 (42.9)  8 (57.1) | 23 (32.4)  48 (67.6) | 12 (34.3)  23 (65.7) | 2 (11.1)  16 (88.9) | 1 (25)  3 (75) | 0.689 |
| Carcinoma in-situ n(%)  -Absent  -Present | 14 (100)  0 (0) | 62 (87.3)  9 (12.7) | 32 (91.4)  3 (8.6) | 16 (88.9)  2 (11.1) | 3 (75)  1 (25) | 0.554 |
| Variant pathology n(%)  -Absent  -Present | 12 (85.7)  2 (14.3) | 60 (84.5)  11 (15.5) | 33 (94.3)  2 (5.7) | 15 (83.3)  3 (16.7) | 3 (75)  1 (25) | 0.611 |
| 2021 EAU Risk Classification n(%)  -Low Risk  -Intermediate Risk  -High Risk  -Very High Risk | 7 (50)  3 (21.4)  2 (14.3)  2 (14.3) | 20 (28.2)  18 (25.4)  18 (25.4)  15 (21.1) | 8 (22.9)  8 (22.9)  10 (28.6)  9 (25.7) | 1 (5.6)  4 (22.2)  6 (33.3)  7 (38.9) | 1 (25)  0 (0)  2 (50)  1 (25) | 0.457 |

BMI: Body mass index, CCI: Charlson comorbidity index, EAU: European Association of Urology, PUNLMP: Papillary urothelial neoplasm of low malignant potential, SD: Standard deviation
